# Supplementary material for: The first report on the utility of an organotellurium compound as a stabilizer in the colloidal synthesis of a transition-metal-containing nanocatalytic system: application to O-arylation of phenol
Source: Royal Society of Chemistry journal article supplement (doi:10.1039/d4nj00493k), 2024-01-01
Supplement: d4nj00493k1.pdf [file d4nj00493k1.pdf]

## Electronic Supplementary Material (ESI)

for

### **First report on the utility of organotellurium compound as stabilizer in the colloidal synthesis of applied nanocatalytic system having transition metal: application in O-arylation of phenol**

Anurag Bahuguna,<sup>a</sup> Preeti Oswal,<sup>b</sup> Suraj Purohit,<sup>a</sup> Anupma Tyagi,<sup>a</sup> and Arun Kumar<sup>a\*</sup>

<sup>a</sup>*Department of Chemistry, School of Physical Sciences, Doon University, Dehradun, India.*

<sup>b</sup>*Department of Chemistry, Texas A&M University, College Station, 77842-3012, United States.*

*Corresponding author: Arun Kumar, E-mail: [arunkaushik@gmail.com](mailto:arunkaushik@gmail.com), [akumar.ch@doonuniversity.ac.in](mailto:akumar.ch@doonuniversity.ac.in)*

## Table of Contents

| Figures                                                                                                                                                  | Tables                                                                                                      |
|----------------------------------------------------------------------------------------------------------------------------------------------------------|-------------------------------------------------------------------------------------------------------------|
| <b>Fig. S1.</b> <sup>1</sup> H NMR of Ligand <b>L1</b>                                                                                                   | <b>Table S1.</b> Optimization of the <i>O</i> -arylation reaction between phenol and 1-bromo-4-nitrobenzene |
| <b>Fig. S2.</b> <sup>13</sup> C NMR of Ligand <b>L1</b>                                                                                                  |                                                                                                             |
| <b>Fig. S3.</b> <sup>125</sup> Te NMR of Ligand <b>L1</b>                                                                                                |                                                                                                             |
| <b>Fig. S4.</b> PXRD pattern of <b>N2</b>                                                                                                                |                                                                                                             |
| <b>Fig. S5.</b> PXRD pattern of <b>N3</b>                                                                                                                |                                                                                                             |
| <b>Fig. S6.</b> XPS pattern of Te-3d region of <b>L1</b>                                                                                                 |                                                                                                             |
| <b>Fig. S7.</b> XPS pattern of Pd-3d region of <b>N2</b>                                                                                                 |                                                                                                             |
| <b>Fig. S8.</b> XPS pattern of Pd-3d region of <b>N3</b>                                                                                                 |                                                                                                             |
| <b>Fig. S9.</b> XPS pattern of Te-3d region of <b>N2</b>                                                                                                 |                                                                                                             |
| <b>Fig. S1.</b> XPS pattern of Te-3d region of <b>N3</b>                                                                                                 |                                                                                                             |
| <b>Fig. S11.</b> Elemental mapping of <b>N1</b> .<br>(a) Layered view (b) Tellurium<br>(c) Palladium                                                     |                                                                                                             |
| <b>Fig. S12.</b> EDS spectral data of <b>N1</b>                                                                                                          |                                                                                                             |
| <b>Fig. S13.</b> Elemental mapping of <b>N2</b> .<br>(a) Layered view (b) Tellurium<br>(c) Palladium                                                     |                                                                                                             |
| <b>Fig. S14.</b> EDS Spectral data of <b>N2</b>                                                                                                          |                                                                                                             |
| <b>Fig. S15.</b> Elemental mapping of <b>N3</b> .<br>(a) Layered view (b) Tellurium<br>(c) Palladium                                                     |                                                                                                             |
| <b>Fig. S16.</b> EDS Spectral data of <b>N3</b>                                                                                                          |                                                                                                             |
| <b>Fig. S17.</b> SEM images of <b>N1</b> at (a) 5μm and<br>(b) 1.0 μm scale                                                                              |                                                                                                             |
| <b>Fig. S18.</b> SEM images of <b>N2</b> at (a) 5μm and<br>(b) 1μm scale                                                                                 |                                                                                                             |
| <b>Fig. S19.</b> SEM images of <b>N3</b> at (a) 5μm and<br>(b) 0.5μm scale                                                                               |                                                                                                             |
| <b>Fig. S20.</b> HR-TEM images of <b>N1</b> at<br>(a) 100nm and (b) 50nm scale                                                                           |                                                                                                             |
| <b>Fig. S21.</b> HR-TEM images of <b>N2</b> at<br>(a) 100nm and (b) 50nm scale                                                                           |                                                                                                             |
| <b>Fig. S22.</b> HR-TEM images of <b>N3</b> at<br>(a) 100nm and (b) 50nm scale                                                                           |                                                                                                             |
| <b>Fig. S22.</b> Results of recyclability studies of the <b>N2</b> in C-O coupling reaction under optimized reaction conditions for five reaction cycles |                                                                                                             |

## **S1. General Experimental Section**

For carrying out HR-TEM studies, JEM 3200FS Electron Microscope operating at 300kV was used. A dispersion of powdered sample in methanol was dropped onto a porous, copper grid supported carbon film and dried under IR-lamp overnight. A JNM ECX-500 NMR spectrometer working at a frequency of 500 MHz was used for recording NMR spectra. FEI-Quanta FEG 200F SEM-EDX system was used for the study of surface morphology and elemental composition. A 9kW SmartLab rotating anode X-ray diffractometer (XRD) was used for PXRD studies. X-ray photoelectron spectroscopic (XPS) studies were carried out using Nexsa base (ThermoFisher) spectrometer. Nitrogen gas was used to create inert atmosphere, wherever required, using Schenk technique. All reactions were carried out in glassware (dried in an oven) under ambient conditions. The  $^1\text{H}$  NMR spectroscopy was used to assess the % conversions of the reactants into products in the C–O coupling reaction.

## **S2. Starting materials, syntheses of ligand L1 and nanoparticles N1-N3**

Bromooctadecane and sodium borohydride were obtained from ThermoFisher Scientific. Diphenyl ditelluride and sodium tetrachloropalladate(II) were obtained from Merck Group. Other chemicals and solvents were procured from local suppliers.

### *S2.1 Synthesis of Ligand (L1)*

Diphenyl ditelluride (0.409 g, 1.0 mmol) was stirred in 10 mL of ethanol at 40°C for 30 minutes in a sealed Schlenk tube. The nitrogen gas was purged into the assembly and a solution of  $\text{NaBH}_4$  (0.100 g, 2.6 mmol) in 15 mL of ethanol was added using a syringe, followed by the addition of a solution of 1-bromooctadecane (0.666 g, 2.0 mmol) in 10 mL ethanol using a syringe. The reaction was stirred for another two hours at room temperature. The flaky white colored solid (**L1**) was obtained. It was filtered and dried in air.

### *S2.2 Synthesis of Nanoparticles N1*

Ligand **L1** (0.229 g, 0.5 mmol) was dissolved in DCM and subjected to stirring. A solution of  $\text{Na}_2\text{PdCl}_4$  (0.147 g, 0.5 mmol) in methanol was added to the stirring solution of the ligand. Stirring was continued for 20 minutes. Thereafter, nitrogen gas was purged and solution of  $\text{NaBH}_4$  (0.039 g, 1.0 mmol) was added to the solution followed by continuous stirring for 2 hours. Black precipitate of **N1** appeared. The black particles were then extracted and washed with methanol in a centrifuge and the resulting residue was dried in vacuo.

### *S2.3 Synthesis of Nanoparticles N2*

Ligand **L1** (0.229 g, 0.5 mmol) was dissolved in DCM and subjected to stirring. A solution of  $\text{Na}_2\text{PdCl}_4$  (0.589 g, 2.0 mmol) in methanol was added to the stirring solution of the ligand. Stirring was continued for 20 minutes. Thereafter, nitrogen gas was purged and methanolic solution of  $\text{NaBH}_4$  (0.156 g, 4.0 mmol) was added to the solution followed by continuous stirring for 2 hours. Black precipitate of **N2** appeared. The black particles were then extracted and washed with methanol in a centrifuge and the resulting residue was dried in vacuo.

### *S2.4 Synthesis of Nanoparticles N3*

Ligand **L1** (0.916 g, 2.0 mmol) was dissolved in DCM and subjected to stirring. A solution of Na<sub>2</sub>PdCl<sub>4</sub> (0.147 g, 0.5 mmol) in methanol was prepared and added to the stirring solution of the ligand. Stirring was continued for 20 minutes. Thereafter, nitrogen gas was purged and methanolic solution of NaBH<sub>4</sub> (0.039 g, 1.0 mmol) was added to the solution followed by continuous stirring for 2 hours. Black precipitate of **N3** appeared. The black particles were then extracted and washed with methanol in a centrifuge and the resulting residue was dried *in vacuo*.

### **S3. General Procedure for O-arylation of phenol catalysed using N1-N3**

An oven dried round bottom flask was charged with aryl halide (1.0 mmol), phenol (1.1 mmol), K<sub>2</sub>CO<sub>3</sub> (2.0 mmol), DMSO (5 mL) and nanoparticles **N1/N2/N3** (25 mg). The flask was equipped with a reflux condenser and the reaction mixture was refluxed for 16 hours at 110°C. The reaction mixture was then cooled to room temperature. Water (25 mL) was added to the reaction mixture. The product was extracted twice using ethyl acetate and washed three times using distilled water. The solution, obtained after washing, was dried over anhydrous Na<sub>2</sub>SO<sub>4</sub>, filtered, and the solvent was evaporated off to obtain the crude product. This crude was subjected to <sup>1</sup>H NMR analysis for determination of percentage conversion.

### **S4. Poisoning and Hot filtration tests**

#### *S4.1 Poisoning tests*

Mercury and PPh<sub>3</sub> poisoning tests were carried out using all three nanocatalysts (i.e., **N1/N2/N3**) for reaction between 1-bromo-4-nitrobenzene and phenol. An oven dried round bottom flask was charged with DMSO (5mL), 25 mg of the catalyst (**N1/N2/N3**) and 400eq. of poisoning agent (Hg or PPh<sub>3</sub>). The mixture was allowed to stirred for 10 minutes. Thereafter, 1-bromo-4-nitrobenzene (1.0 mmol), phenol (1.1 mmol) and K<sub>2</sub>CO<sub>3</sub> (2.0 mmol) were added to the system. The reaction mixture was stirred and refluxed at 110 °C for 16 hours. The reaction mixture was then cooled to room temperature and water (25 mL) was added to it. The reaction mixture was decanted in case of mercury poisoning test and normal procedure (as adopted for other reactions) was followed for further workup. The assessment of % conversions was done using <sup>1</sup>H NMR spectroscopic analysis. No significant drop in conversion was observed during these tests.

#### *S4.2. Procedure for Hot filtration test*

An oven dried round bottom flask was charged with 1-bromo-4-nitrobenzene (2.0 mmol), phenol (2.2 mmol), K<sub>2</sub>CO<sub>3</sub> (4.0 mmol), DMSO (10 mL) and nanoparticles of **N1** (50 mg). The flask was equipped with a reflux condenser and the mixture was refluxed at 110 °C. After 3 hours, the reaction mixture was cooled and centrifuged to extract the catalyst. After separation of the catalyst, the reaction mixture was divided into 3 parts. One part was consumed to assess the % conversion. The catalyst was reintroduced to one of the remaining two parts in the same proportion in which it was added in the original reaction mixture. Both the remaining portions were again placed under refluxion for 8 hours. Reactions in both mixtures were quenched and conversion for estimated using <sup>1</sup>H NMR spectroscopy.

### **S5. Experiments for catalysts' recyclability**

To study the reusability of the catalytic system, five cycles of the catalytic reactions between 4-chloronitrobenzene and phenol were performed in the presence of the nanocatalytic system **N2** and assessment of the conversions was made for every cycle. An oven dried round bottom flask was charged with 4-chloronitrobenzene (1.0 mmol), phenol (1.1 mmol),  $K_2CO_3$  (2.0 mmol), DMSO (5 mL), and nanoparticles **N2** (50 mg). The flask was equipped with a reflux condenser and refluxion was carried out for 16 hours at 110 °C. The reaction mixture was cooled to room temperature and water (25 mL) was added to it. Thereafter, the product was extracted using ethyl acetate and nanoparticles were centrifuged from the aqueous layer. The extracted nanoparticles were the reused in a fresh set of C–O coupling reaction of phenol and 4-chloronitrobenzene. The results obtained have been compiled in [Fig. S23](#).

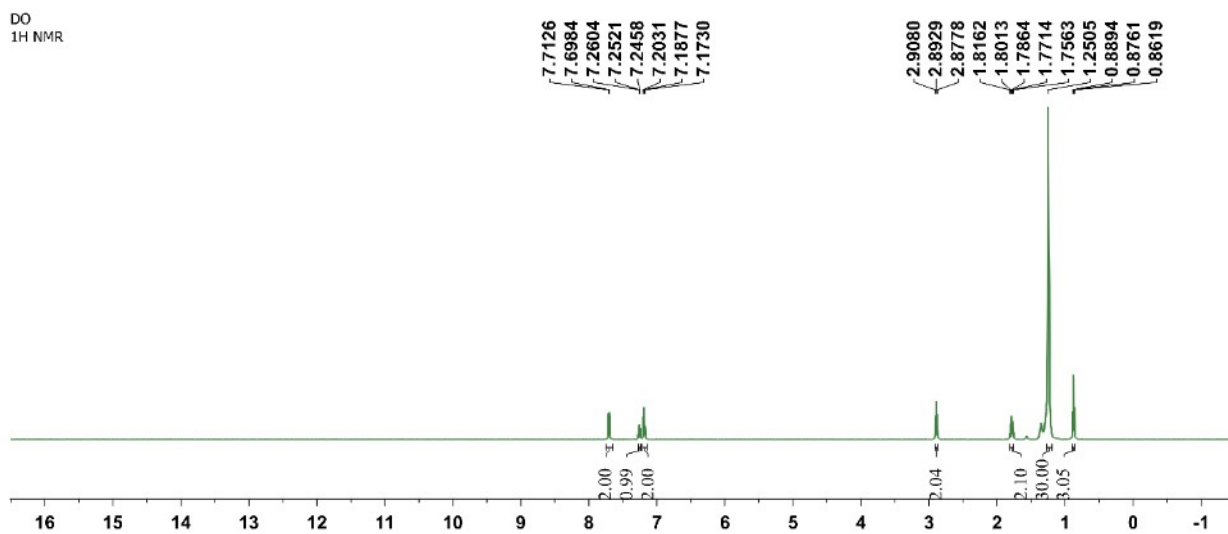

Fig. S1.  $^1\text{H}$  NMR of Ligand L1

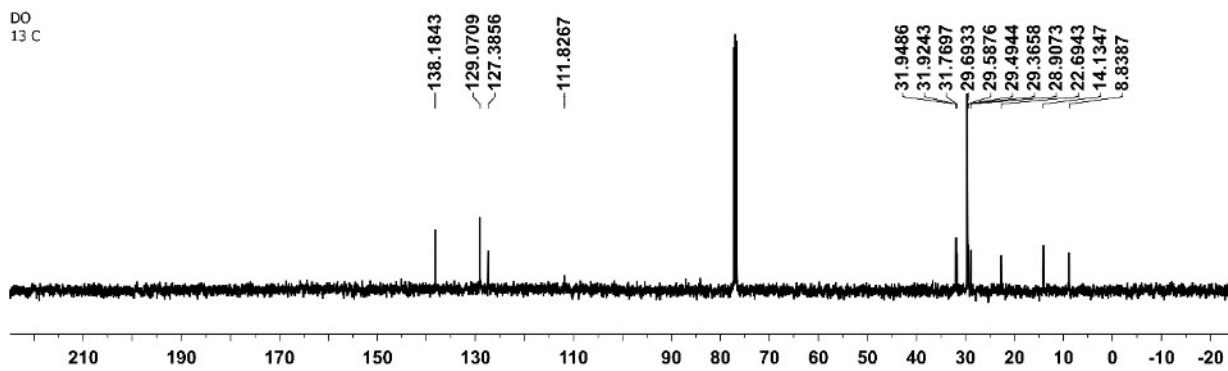

Fig. S2.  $^{13}\text{C}$  NMR of Ligand L1

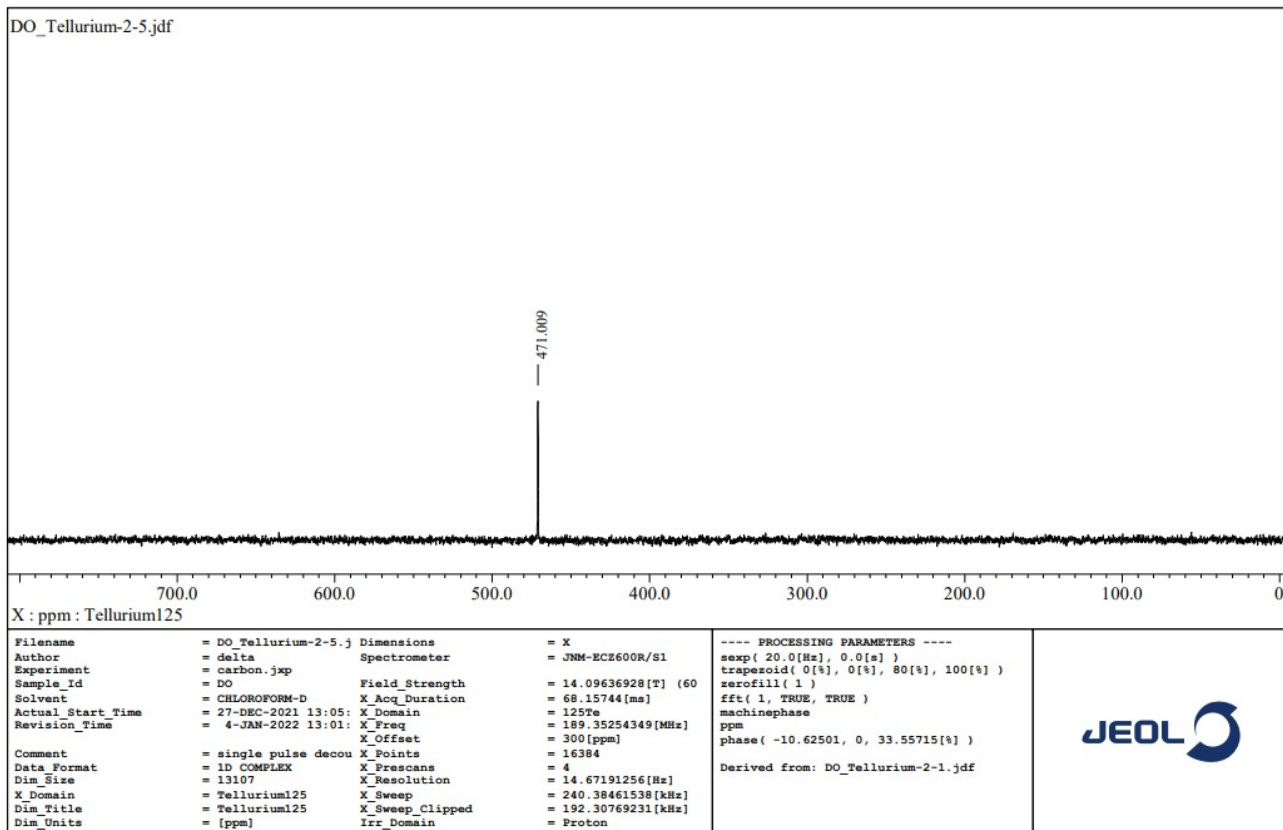

Fig. S3.  $^{125}\text{Te}$  NMR of Ligand L1

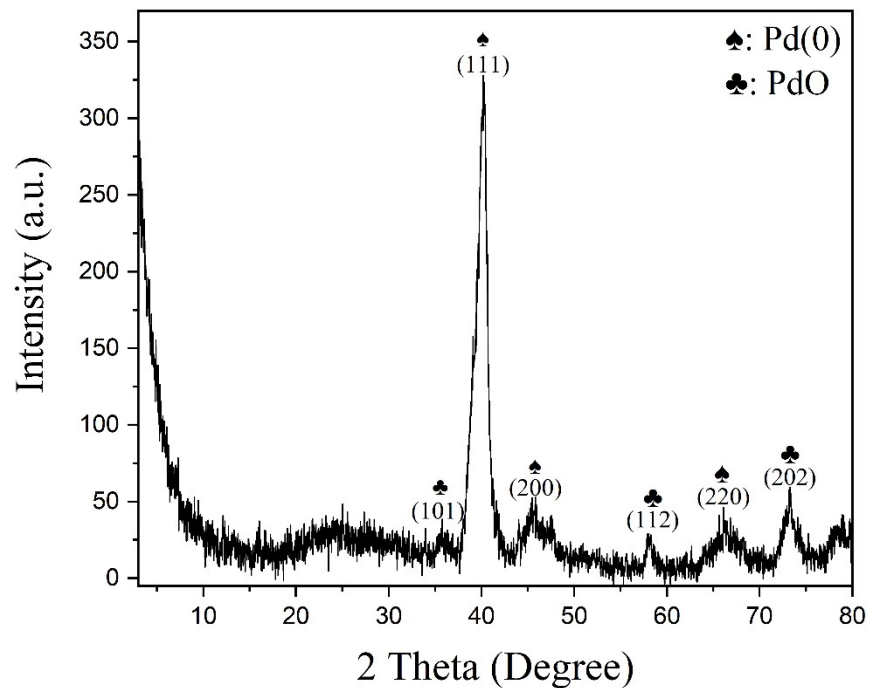

Fig. S4. PXRD pattern of N2

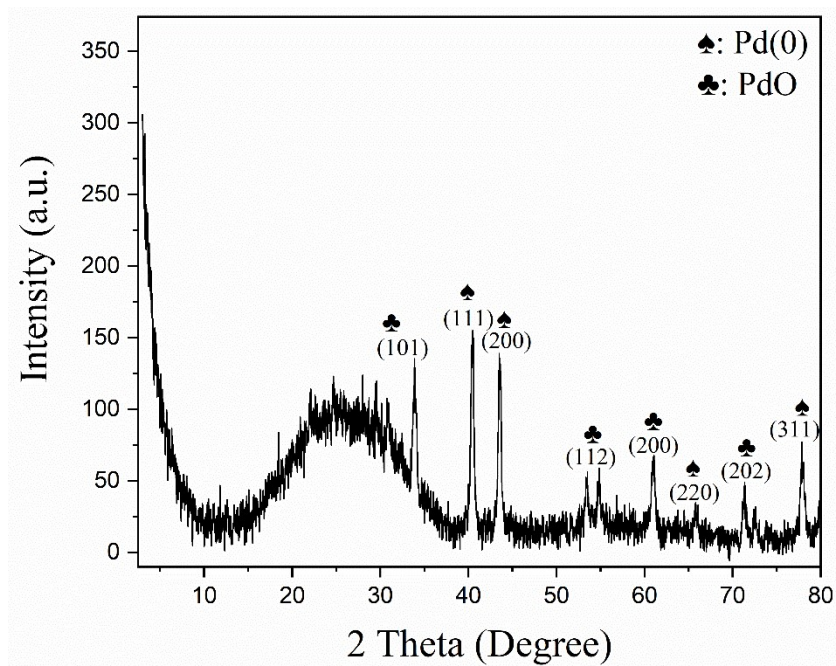

Fig. S5. PXRD pattern of N3



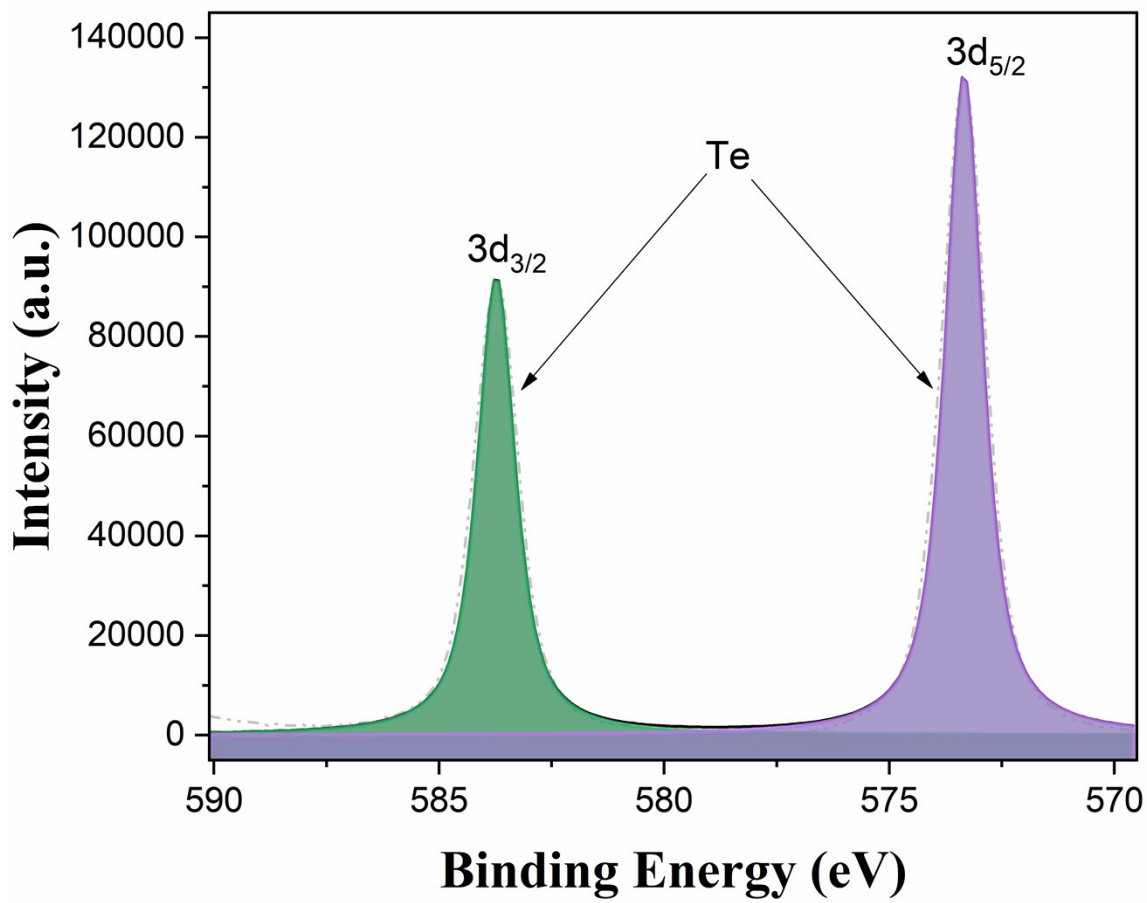

Fig. S6. XPS pattern of Te-3d region of L1

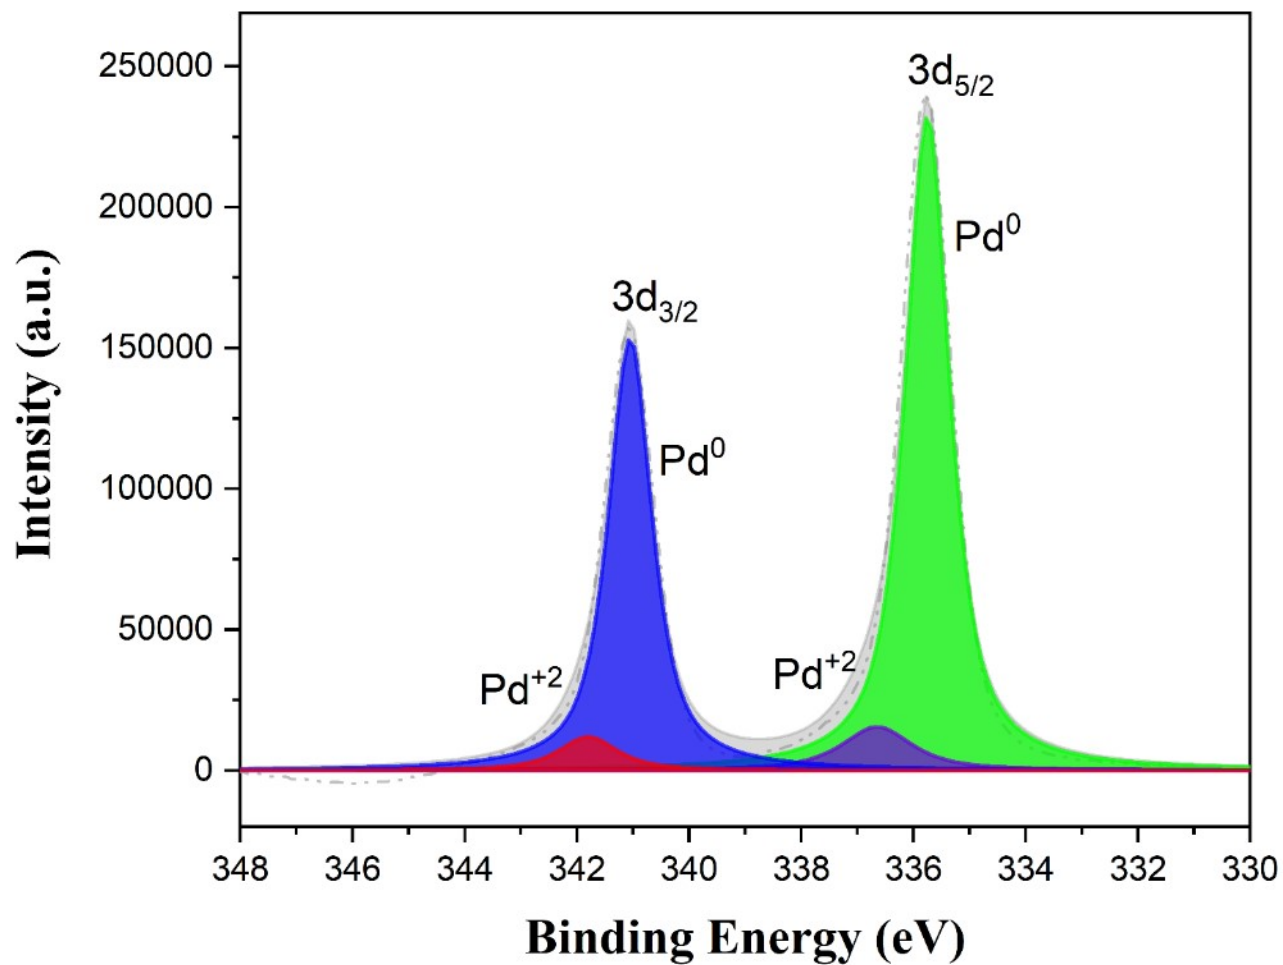

Fig. S7. XPS pattern of Pd-3d region of N<sub>2</sub>

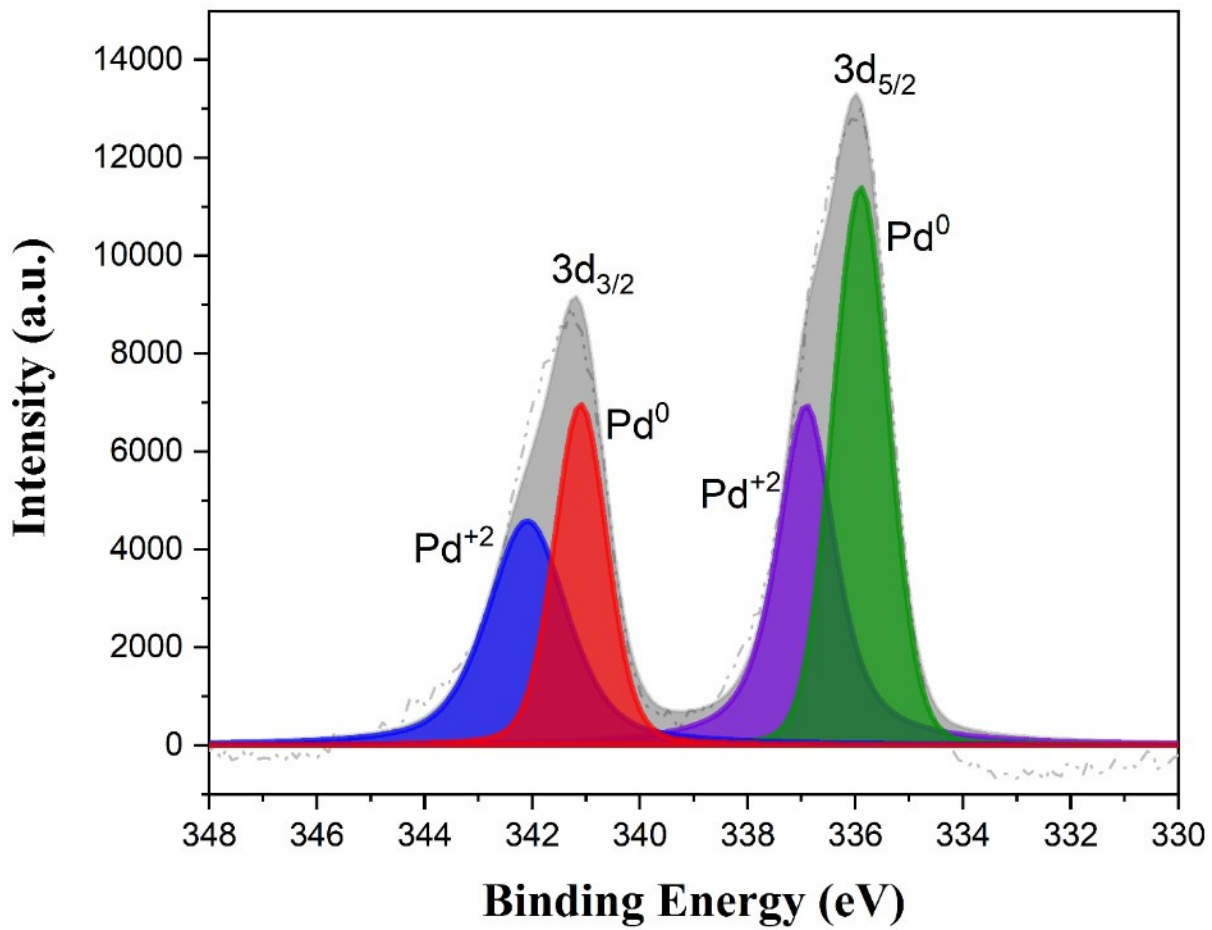

Fig. S8. XPS pattern of Pd-3d region of N3

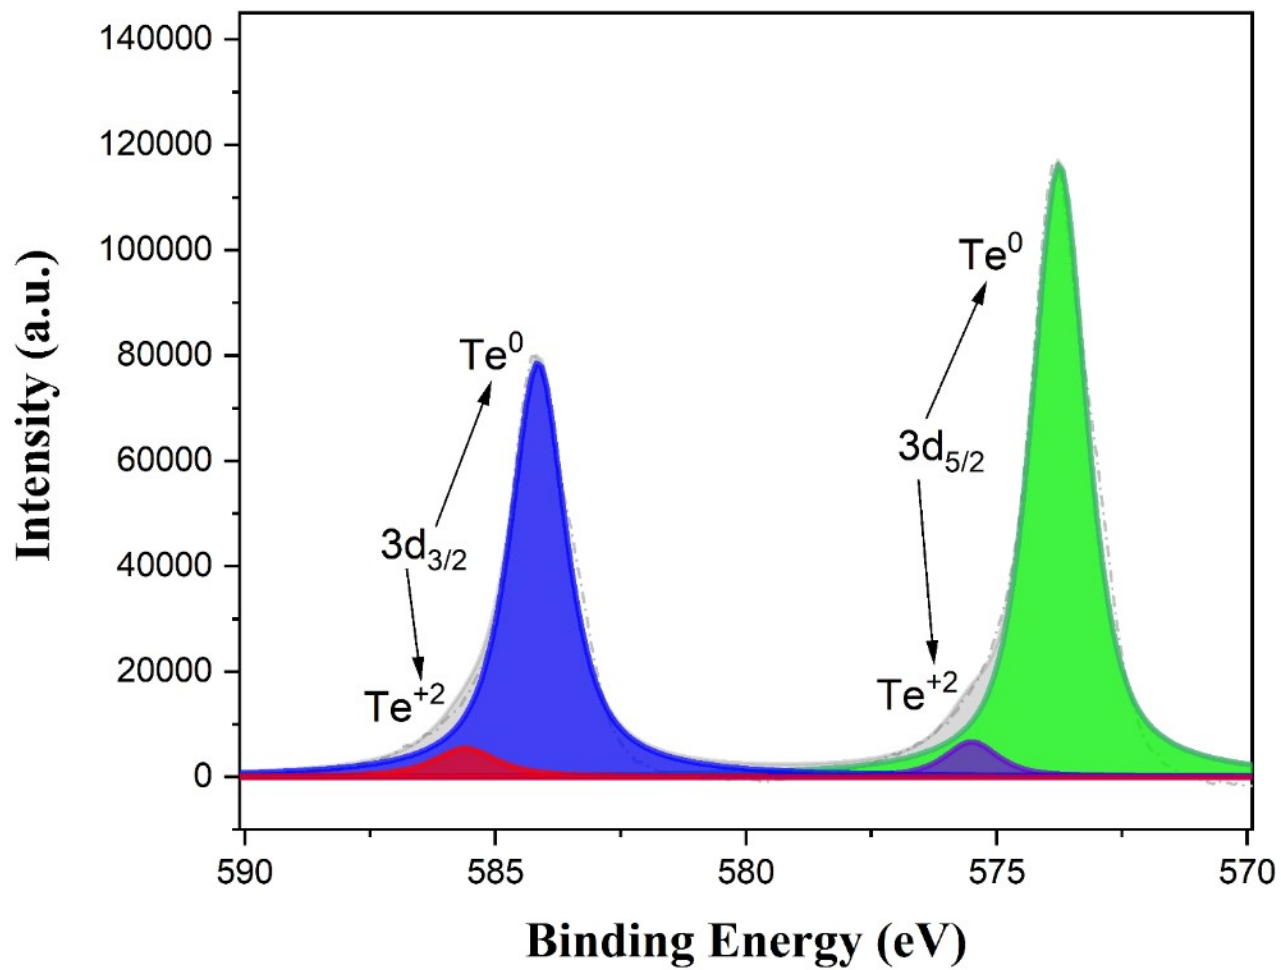

Fig. S9. XPS pattern of Te-3d region of N<sub>2</sub>

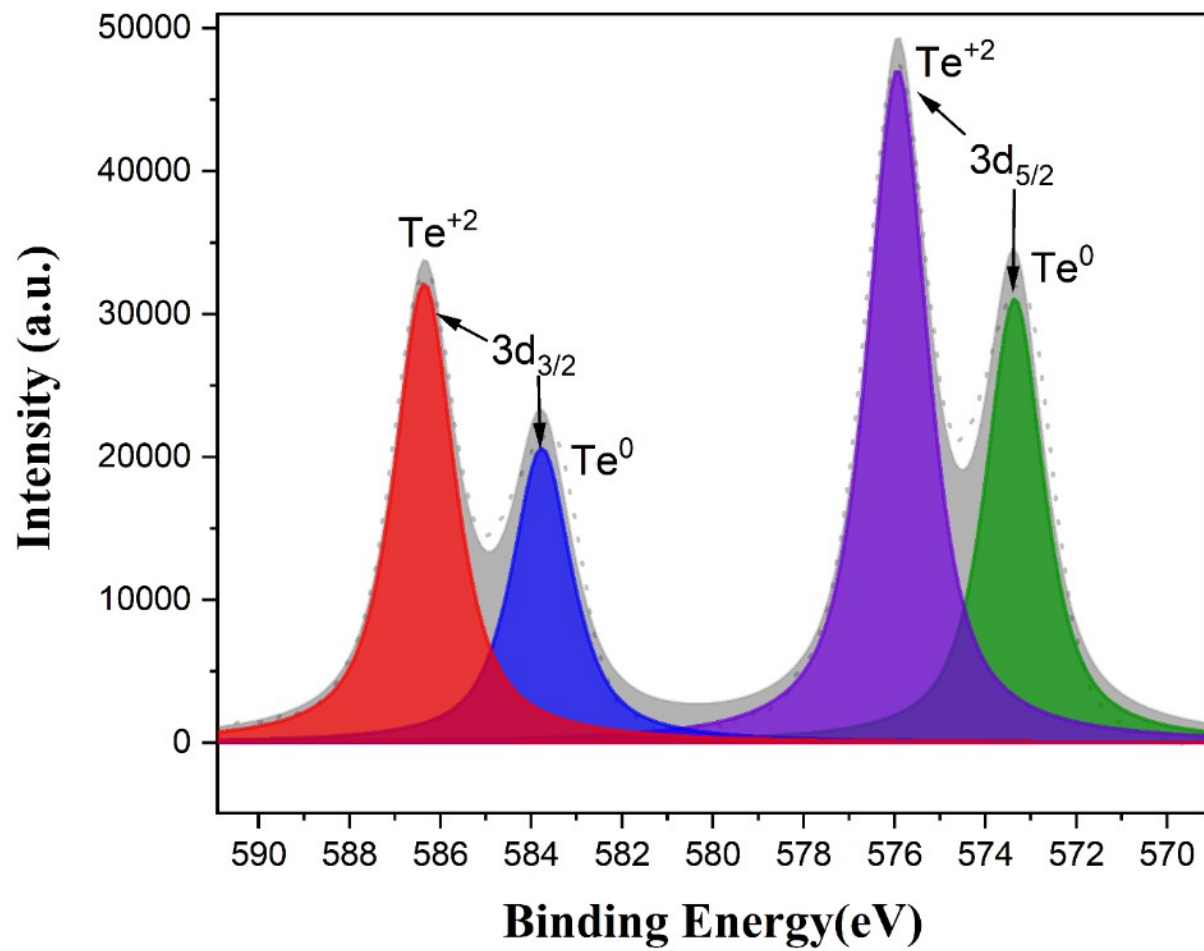

Fig. S10. XPS pattern of Te-3d region of N3

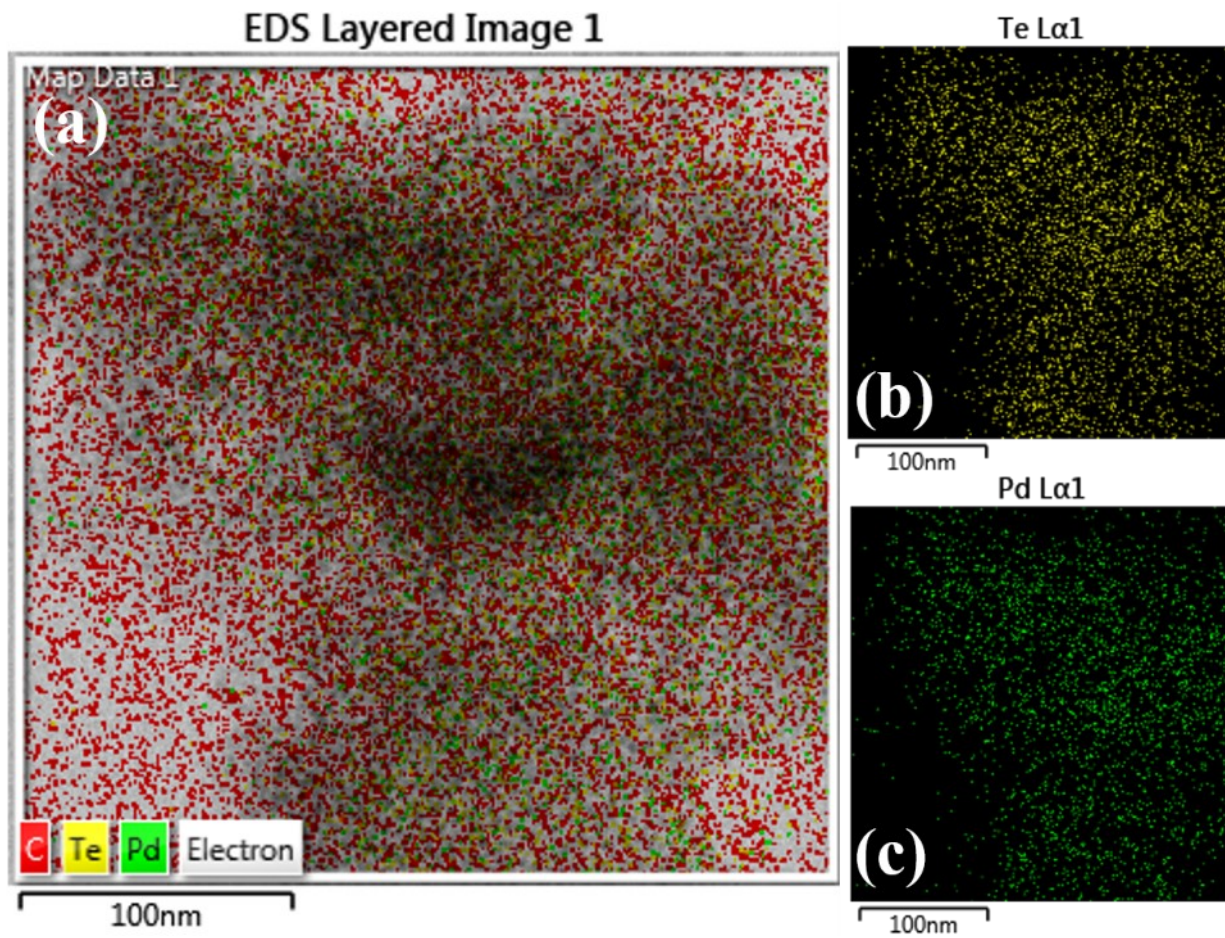

**Fig. S11.** Elemental mapping of N1. (a) Layered view (b) Tellurium (c) Palladium

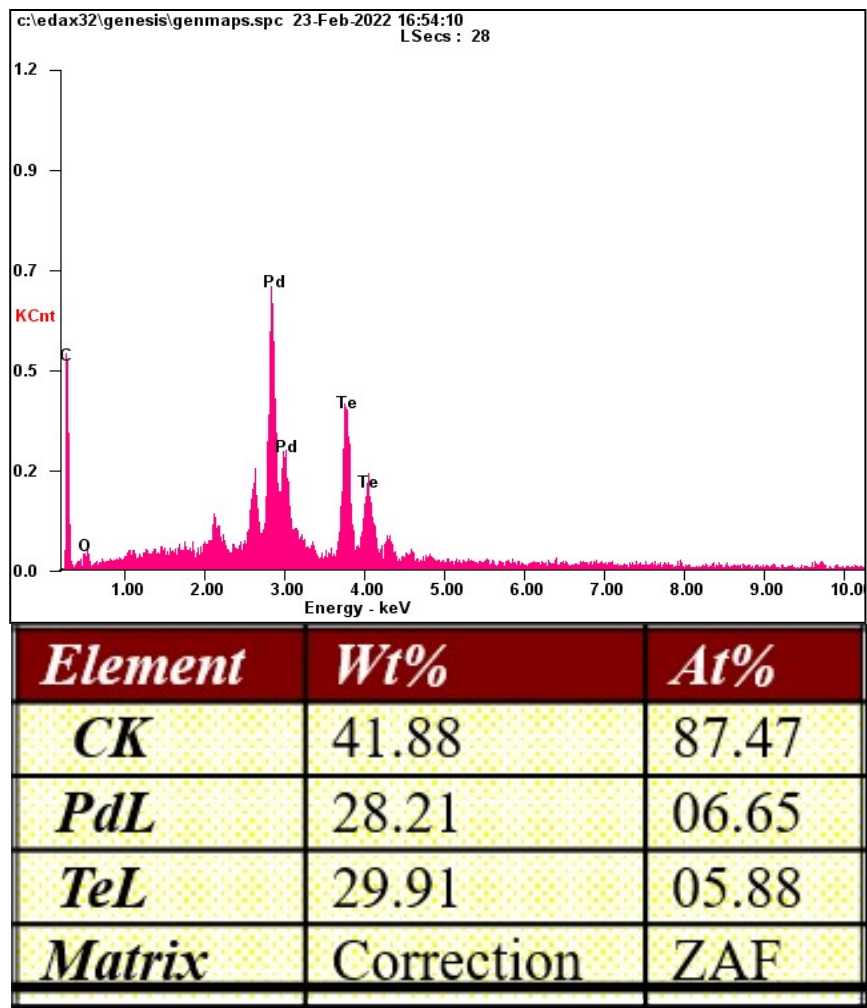

Fig. S12. EDS spectral data of N1

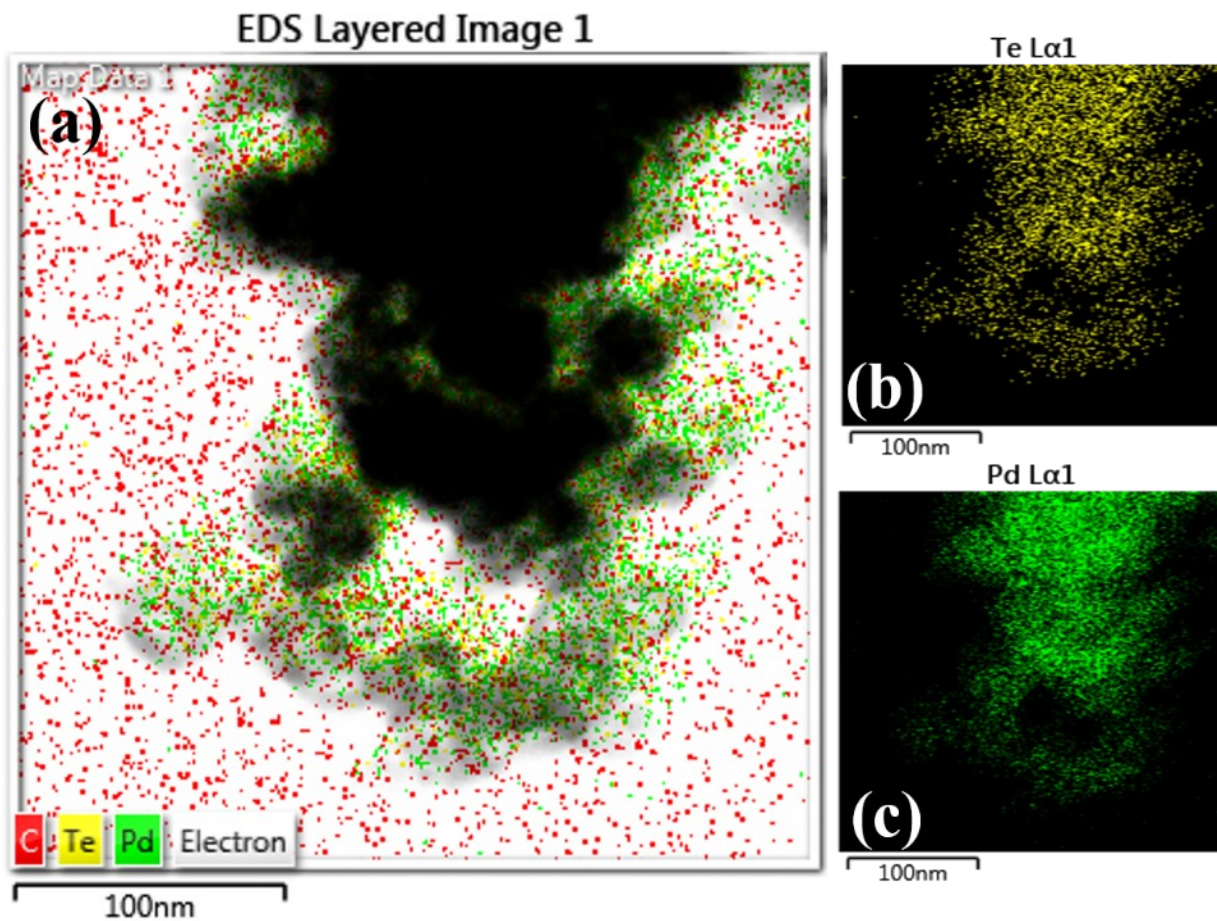

**Fig. S13.** Elemental mapping of N2. (a) Layered view (b) Tellurium (c) Palladium



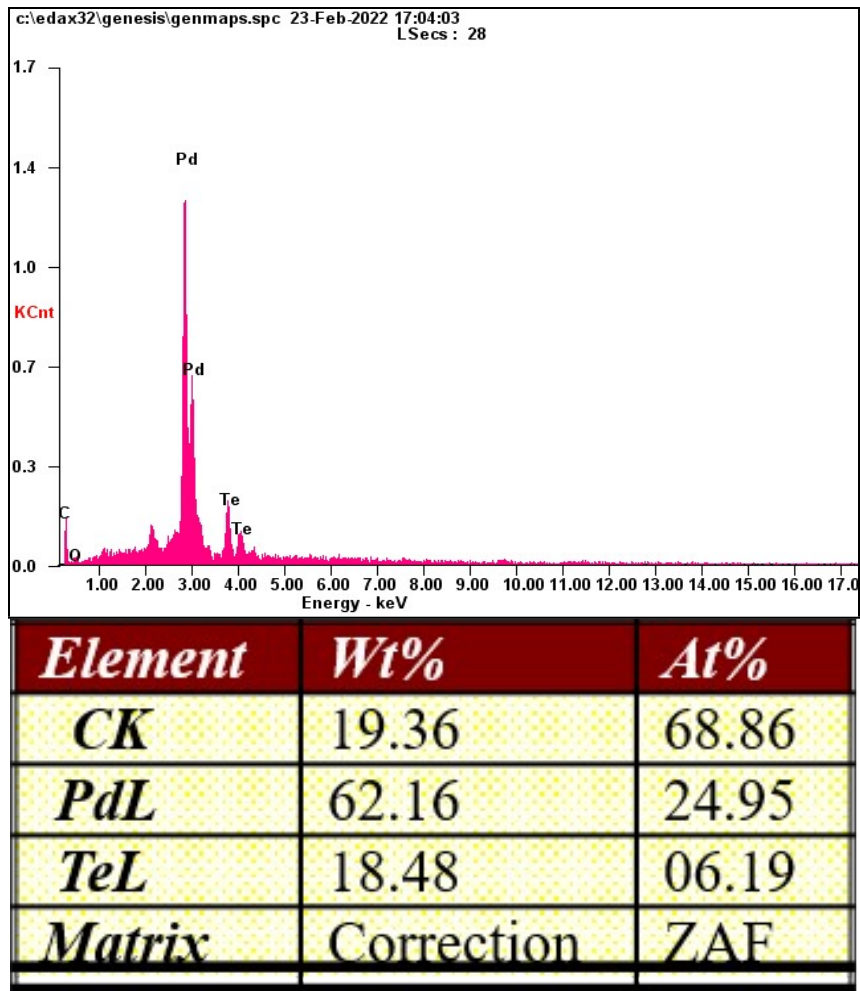

Fig. S14. EDS Spectral data of N2

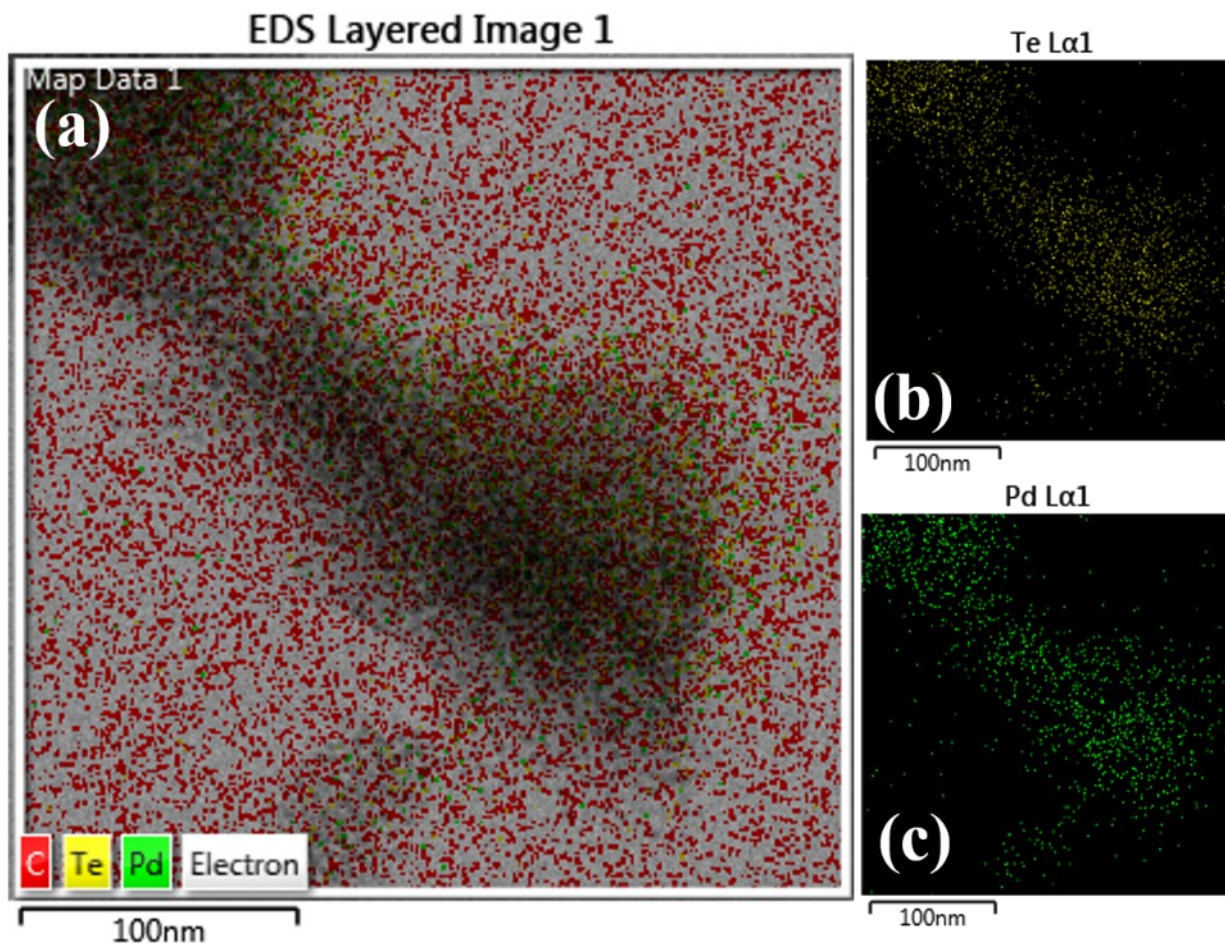

**Fig. S15.** Elemental mapping of N3. (a) Layered view (b) Tellurium (c) Palladium

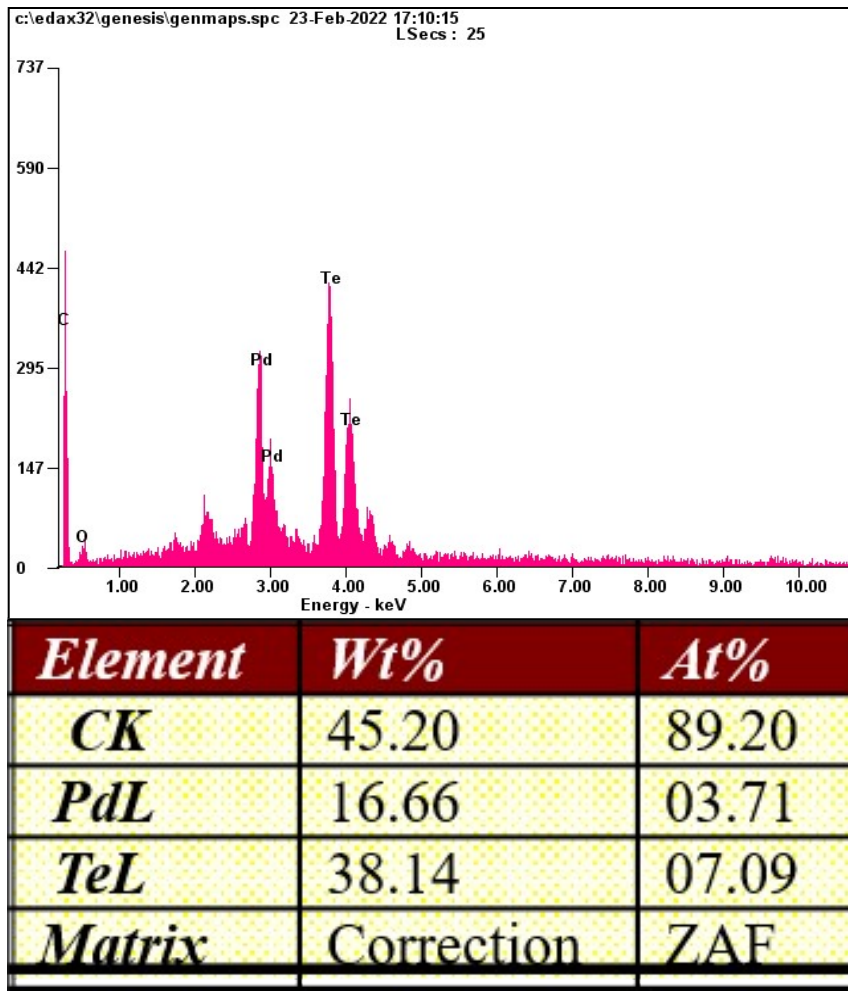

Fig. S16. EDS Spectral data of N3

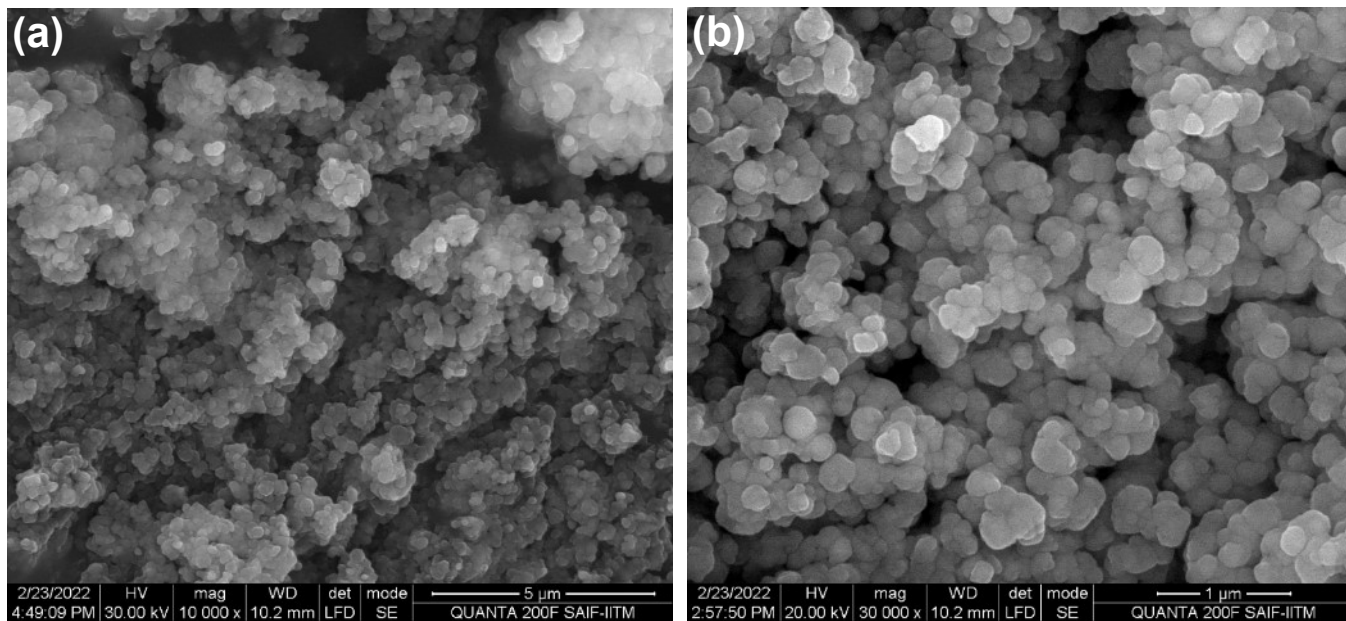

**Fig. S17.** SEM images of N1 at (a) 5 $\mu$ m and (b) 1 $\mu$ m scale

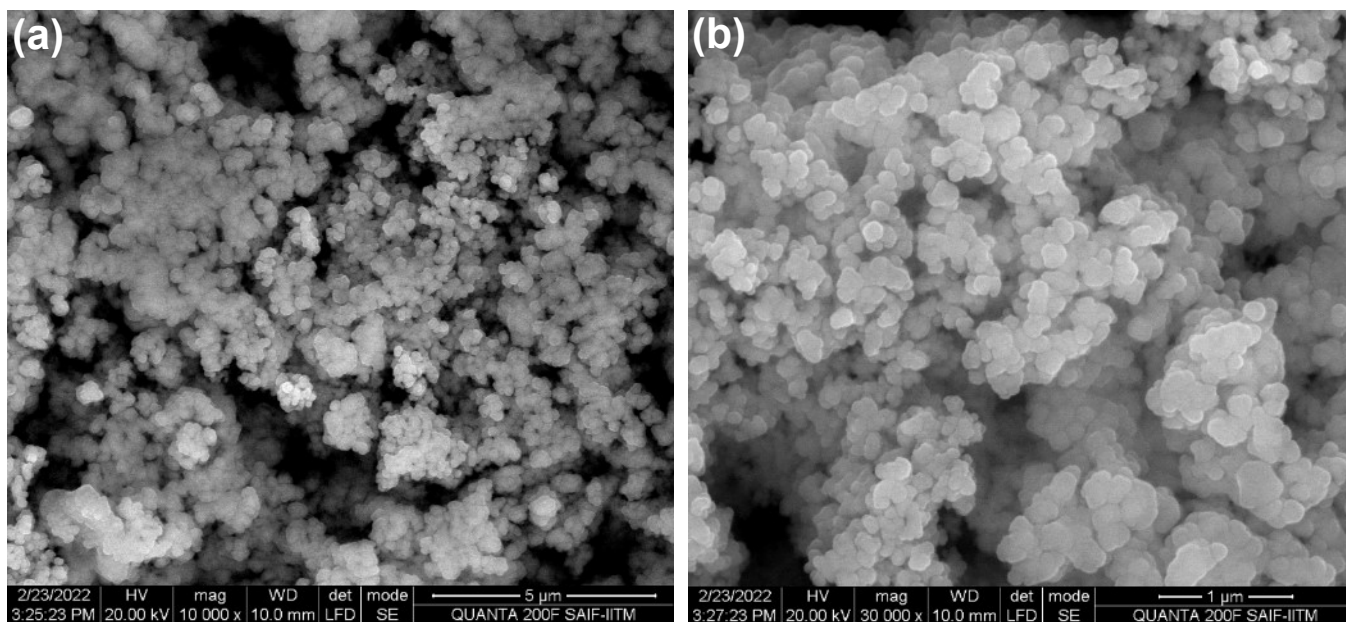

**Fig. S18.** SEM images of N2 at (a) 5 $\mu$ m and (b) 1 $\mu$ m scale

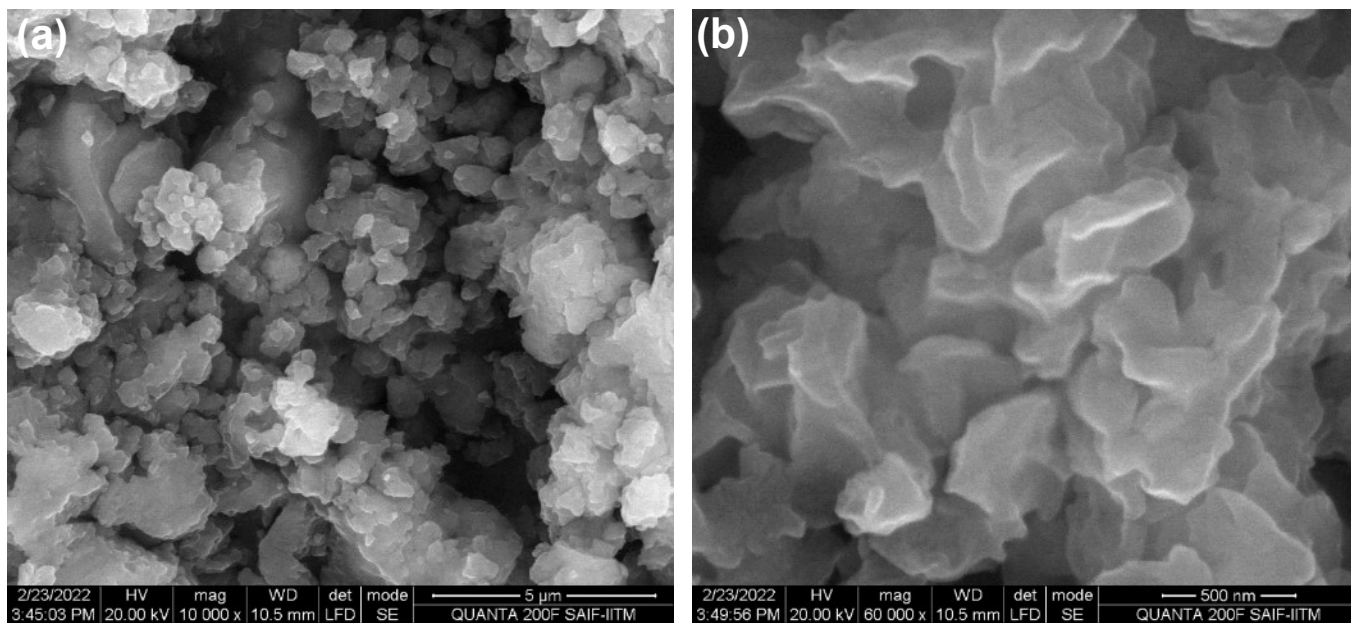

**Fig. S19.** SEM images of N3 at (a) 5 μm and (b) 0.5 μm scale

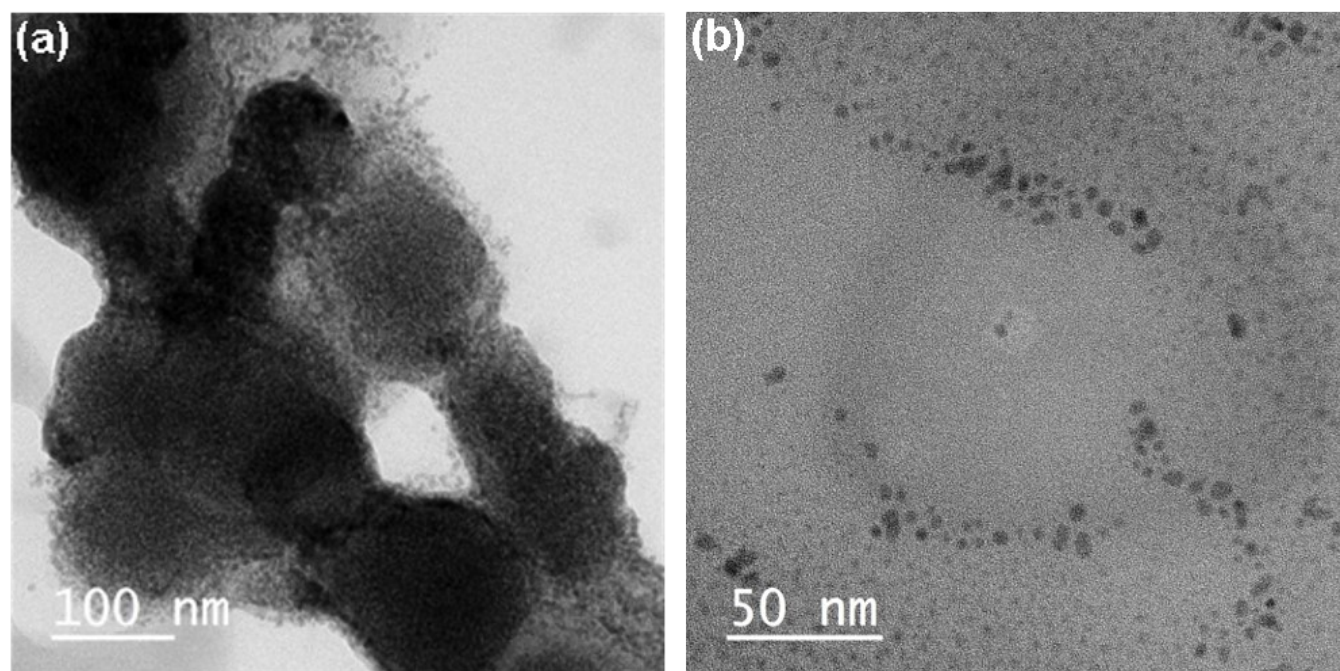

**Fig. S20.** HR-TEM images of N1 at (a) 100 nm and (b) 50 nm scale

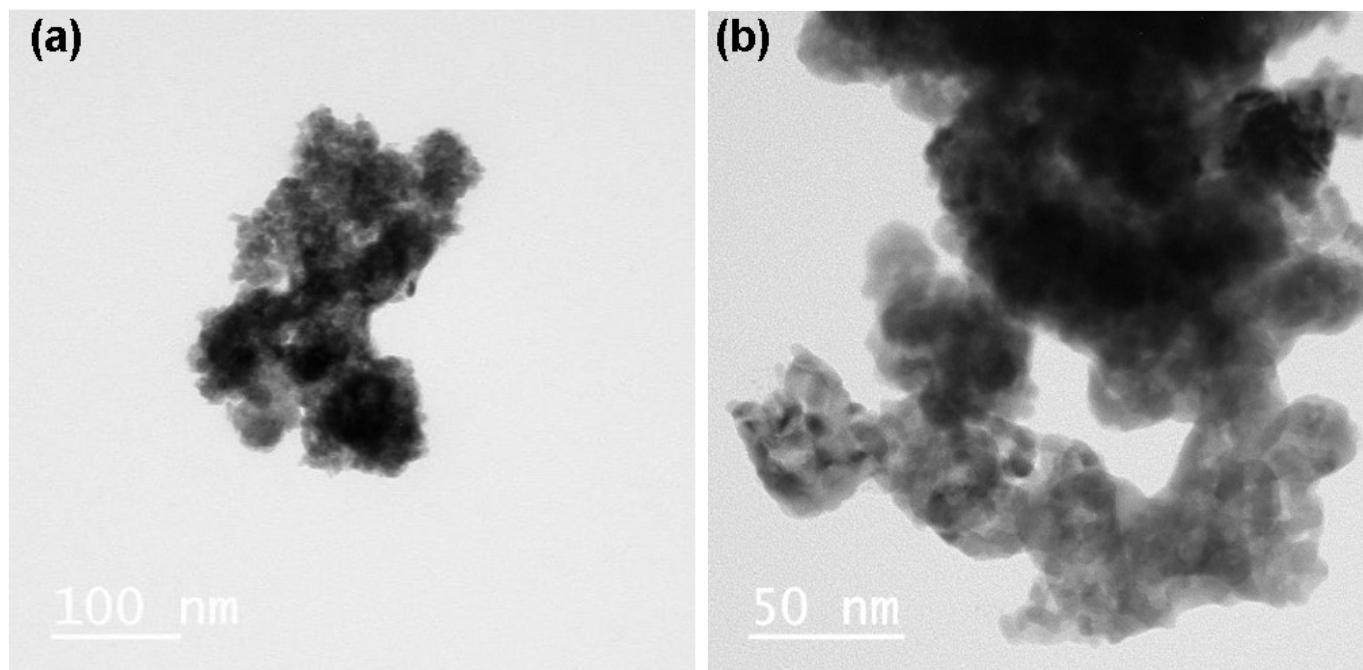

**Fig. S21.** HR-TEM images of N2 at (a) 100nm and (b) 50nm scale

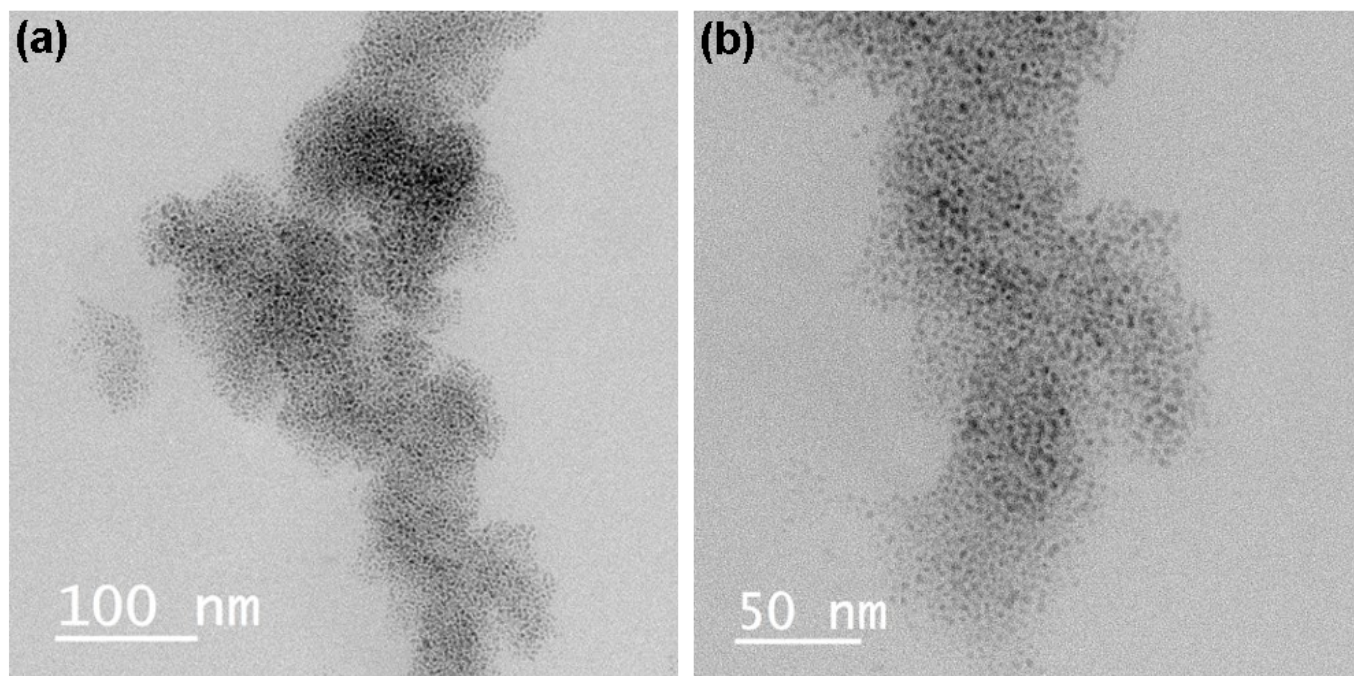

**Fig. S22.** HR-TEM images of N3 at (a) 100nm and (b) 50nm scale

**Table S1.** Optimization of the *O*-arylation reaction between phenol and 1-bromo-4-nitrobenzene

| 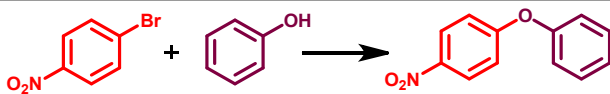 |         |                                 |                  |       |              |
|------------------------------------------------------------------------------------|---------|---------------------------------|------------------|-------|--------------|
| S. No                                                                              | Solvent | Base                            | Catalyst Loading | Temp  | % Conversion |
| 1.                                                                                 | DMSO    | K <sub>2</sub> CO <sub>3</sub>  | 25mg             | 110°C | >99%         |
| 2.                                                                                 | DMF     | K <sub>2</sub> CO <sub>3</sub>  | 25mg             | 110°C | >99%         |
| 3.                                                                                 | Water   | K <sub>2</sub> CO <sub>3</sub>  | 25mg             | 110°C | Trace        |
| 4.                                                                                 | Toluene | K <sub>2</sub> CO <sub>3</sub>  | 25mg             | 110°C | 47%          |
| 5.                                                                                 | Ethanol | K <sub>2</sub> CO <sub>3</sub>  | 25mg             | 110°C | 50.5%        |
| 6.                                                                                 | DMSO    | NaOH                            | 25mg             | 110°C | 79.3%        |
| 7.                                                                                 | DMSO    | Na <sub>2</sub> CO <sub>3</sub> | 25mg             | 110°C | 53.1%        |
| 8.                                                                                 | DMSO    | Et <sub>3</sub> N               | 25mg             | 110°C | 50.7%        |
| 9.                                                                                 | DMSO    | NaOAc                           | 25mg             | 110°C | 62.1%        |
| 10.                                                                                | DMSO    | K <sub>2</sub> CO <sub>3</sub>  | 25mg             | 80°C  | 55.5%        |
| 11.                                                                                | DMSO    | K <sub>2</sub> CO <sub>3</sub>  | 25mg             | r.t.  | Trace        |
| 12.                                                                                | DMSO    | K <sub>2</sub> CO <sub>3</sub>  | 15mg             | 110°C | 47.1%        |
| 13.                                                                                | DMSO    | K <sub>2</sub> CO <sub>3</sub>  | 40mg             | 110°C | >99%         |
| 14. <sup>a</sup>                                                                   | DMSO    | K <sub>2</sub> CO <sub>3</sub>  | 25mg             | 110°C | 57.1%        |

**Reaction Conditions:** 1-Bromo-4-nitrobenzene(1.0 mmol); phenol(1.2 mmol); base(2.0 mmol); Solvent(5 mL); Reaction time :16h. <sup>a</sup>Reaction time 6 hours

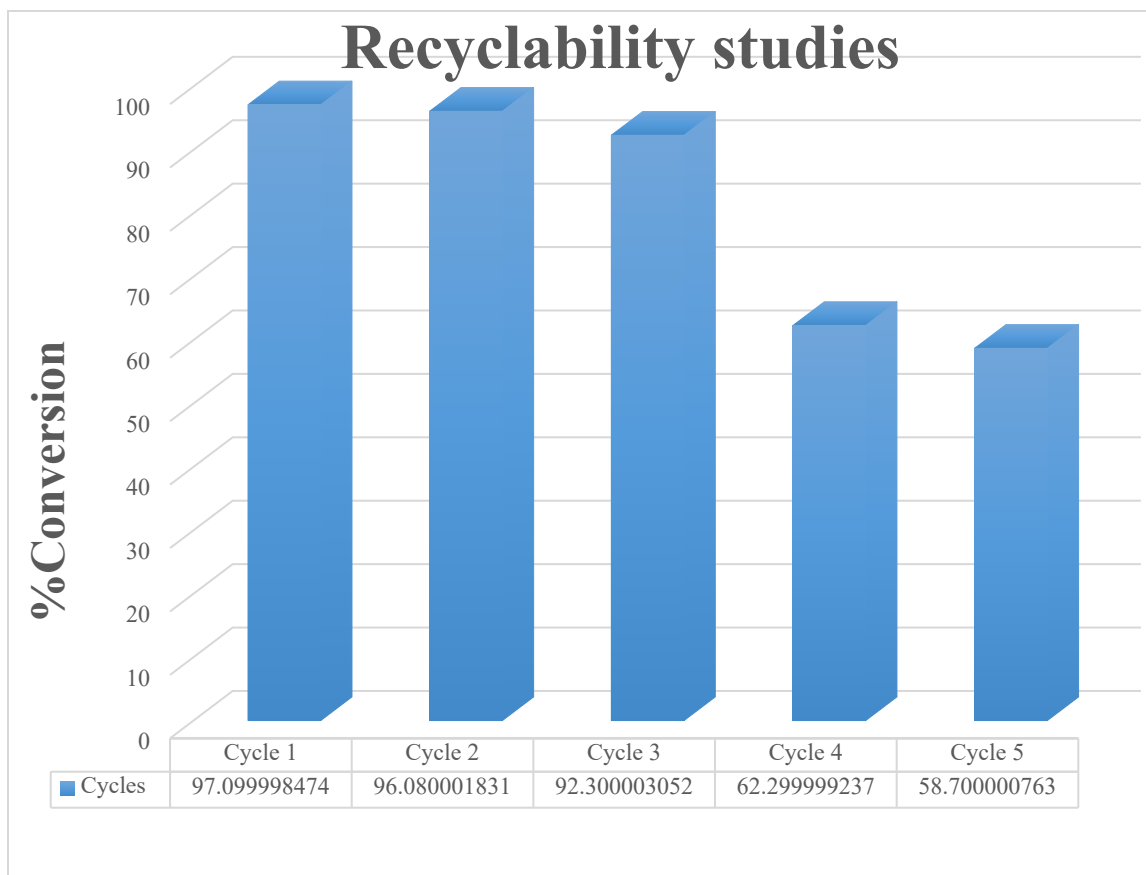

**Fig S23.** Results of recyclability studies of the **N2** in C–O coupling reaction under optimized reaction conditions for five reaction cycles
